# Supplementary material for: Lysophosphatidylethanolamine Affects Lipid Accumulation and Metabolism in a Human Liver-Derived Cell Line
Source: MDPI journal article supplement (doi:10.3390/nu14030579), 2022-01-28
Supplement: s1 [file s1]

Lysophosphatidylethanolamine affects lipid accumulation and metabolism in a human liver-derived cell line

Yusuke Yamamoto<sup>1,†</sup>, Toshihiro Sakurai<sup>1,†</sup>, Zhen Chen<sup>1</sup>, Nao Inoue<sup>1</sup>, Hitoshi Chiba<sup>2</sup> and Shu-Ping Hui<sup>1,\*</sup>

1. Faculty of Health Sciences, Hokkaido University, Kita-12, Nishi-5, Kita-ku, Sapporo 060-0812, Japan; ymmasxy@gmail.com (Y.Y.); sakura@hs.hokudai.ac.jp (T.S.); chenzhen@hs.hokudai.ac.jp (Z.C.); naobee0628@eis.hokudai.ac.jp (I.N.)
2. Department of Nutrition, Sapporo University of Health Sciences, Nakanuma Nishi-4-2-1-15, Higashi-ku, Sapporo 070-0894, Japan; chiba-h@sapporo-hokeniryou-u.ac.jp

\* Correspondence: keino@hs.hokudai.ac.jp; Tel. & Fax: +81-11-706-3693

† These authors contributed equally to this work.

Table S1. Primer sequences of each gene used for real-time PCR

| Gene          | Species | Primer sequence (5'-3')                                 |
|---------------|---------|---------------------------------------------------------|
| <i>GAPDH</i>  | Human   | F: GAAGGTGAAGGTCGGAGTC<br>R: GAAGATGGTGATGGGATTTC       |
| <i>ATGL</i>   | Human   | F: ACCAGCATCCAGTTCAACCT<br>R: ATCCCTGCTTGACATCTCT       |
| <i>DGAT1</i>  | Human   | F: TATTGCGGCCAATGTCTTTGC<br>R: CACTGGAGTGATAGACTCAACCA  |
| <i>SCD1</i>   | Human   | F: GACGATGAGCTCCTGCTGTT<br>R: CTCTGCTACACTTGGGAGCC      |
| <i>SREBP1</i> | Human   | F: CAGCCCCACTTCATCAAGG<br>R: ACTGTTGCCAAGATGGTTCCG      |
| <i>PPARG</i>  | Human   | F: CTTATCTATGACAGATGTGATCTT<br>R: GCTGGTCGATATCACTGGAGA |
| <i>CD36</i>   | Human   | F: GGCTGTGACCGGAACTGTG<br>R: AGGTCTCCAACCTGGCATTAGAA    |

F: Forward, R: Reverse.
